# Supplementary material
Source: publisher figshare collection journal article supplement (https://acs.figshare.com/ndownloader/files/4216981)
Supplement: Supplementary file 1 [file 4216981]

Synthesis and Structure Activity Relationship (SAR)  
of (5,7-disubstituted 3-phenylsulfonyl-pyrazolo[1,5-*a*]  
pyrimidin-2-yl)-methyamines as Potent Serotonin  
5-HT<sub>6</sub> Receptor (5-HT<sub>6</sub>R) Antagonists.

*Alexandre V. Ivachtchenko<sup>a,b</sup>, Elena S. Golovina<sup>c</sup>, Madina G. Kadieva<sup>a</sup>, Volodymyr M. Kysil<sup>b</sup>,  
Oleg D. Mitkin<sup>a</sup>, Sergey E. Tkachenko<sup>b</sup>, Ilya M. Okun<sup>b,\*</sup>*

<sup>a</sup> Department of Organic Chemistry, Chemical Diversity Research Institute, 114401 Khimki,  
Moscow Reg, Russia.

<sup>b</sup> ChemDiv, Inc., 6605 Nancy Ridge Drive, San Diego, CA 92121, USA

<sup>c</sup> Department of Molecular Pharmacology, Chemical Diversity Research Institute, 114401  
Khimki, Moscow Reg, Russia

Address correspondence to: Ilya Okun, ChemDiv, Inc., 6605 Nancy Ridge Drive, San Diego, CA  
92121, Ph.: 858-794-4860, Fax: 858-794-4931, e-mail: [iokun@chemdiv.com](mailto:iokun@chemdiv.com)

## Table of Contents

| Sr. No. | Topic                                                        | Page |
|---------|--------------------------------------------------------------|------|
| 1       | Synthesis of <b>36–45</b> (Refer to Scheme 2 in the paper)   | S2   |
| 2       | Synthesis of <b>54 – 56</b> (Refer to Scheme 3 in the paper) | S3   |

### 1. Synthesis of substituted 5-methyl-2-methylamino-3-phenylsulfonyl-pyrazolo[1,5-*a*]pyrimidines **36 – 45** (Refer to Scheme 2 in the paper).

*N*<sup>3</sup>-methyl-4-(phenylsulfonyl)-1*H*-pyrazole-3,5-diamines **33**, **34**, and **46** (27.8 mmol each) were mixed with a corresponding 1,3-dicarbonyl compound, **48 – 52**, **53** (83.4 mmol each), and AcOH (20 mL). The mixtures were stirred overnight at ambient temperature. Then the samples were heated for 1–2 h at 80–100°C and cooled down. Precipitates were filtered, washed with AcOH, *i*-PrOH, and dried to produce 5-methyl-2-methylamino-3-phenylsulfonyl-pyrazolo[1,5-*a*]pyrimidines **36 – 45** as colorless solid compounds (yields: 63–75%) that were used in the follow up step without their further purification.

**36** 5-Methyl-2-(methylamino)-3-(phenylsulfonyl)pyrazolo[1,5-*a*]pyrimidin-7-ol (yield: 84 %). <sup>1</sup>H NMR (DMSO-*d*<sub>6</sub>) δ 11.50 (s, 1H), 8.12 (d, *J* = 7.6 Hz, 2H), 7.68 (t, *J* = 7.2 Hz, 1H), 7.61 (t, *J* = 7.6 Hz, 2H), 5.94 (q, *J* = 5.2 Hz, 1H), 5.74 (s, 1H), 2.78 (d, *J* = 4.4 Hz, 3H), 2.36 (s, 3H). MS-ESI calculated for C<sub>14</sub>H<sub>14</sub>N<sub>4</sub>O<sub>3</sub>S (M+H) 319, found *m/z* 319. LC-MS (UV-254), purity: 98%.

**37**: 6-Chloro-5-methyl-2-(methylamino)-3-(phenylsulfonyl)pyrazolo[1,5-*a*]pyrimidin-7-ol (yield: 41 %). <sup>1</sup>H NMR (DMSO-*d*<sub>6</sub>) δ 12.10–11.54 (brs, 1H), 8.11 (d, *J* = 7.2 Hz, 2H), 7.70 (t, *J* = 7.2 Hz, 1H), 7.61 (t, *J* = 7.6 Hz, 2H), 6.11–5.93 (brs, 1H), 2.79 (s, 3H), 2.54 (s, 3H), 2.08 (s, 3H). MS-ESI calculated for C<sub>14</sub>H<sub>13</sub>ClN<sub>4</sub>O<sub>3</sub>S (M+H) 353, found *m/z* 353. LC-MS (UV-254), purity: 98%.

**38**: 6-Chloro-3-(3-chlorophenylsulfonyl)-5-methyl-2-(methylamino)pyrazolo[1,5-*a*]pyrimidin-7-ol (yield: 63%). <sup>1</sup>H NMR (DMSO-*d*<sub>6</sub>) δ 12.19–11.15 (brs, 1H), 8.24 (s, 1H), 8.08 (d, *J* = 8 Hz, 1H), 7.75 (d, *J* = 7.6 Hz, 1H), 7.65 (t, *J* = 8 Hz, 1H), 6.09 (m, 1H), 2.80 (s, 3H), 2.54 (s, 3H). MS-ESI calculated for C<sub>14</sub>H<sub>12</sub>Cl<sub>2</sub>N<sub>4</sub>O<sub>3</sub>S (M+H) 388, found *m/z* 388. LC-MS (UV-254), purity: 98%.

**39**: 2-[3-(Phenylsulfonyl)-5-methyl-2-(methylamino)pyrazolo[1,5-*a*]pyrimidin-7-ylmethyl]isoindole-1,3-dione (yield: 9%). <sup>1</sup>H NMR (CDCl<sub>3</sub>), δ: 7.97 (m, 2H), 7.93 (m, 2H), 7.80 (m, 2H), 7.44 (m, 1H), 7.34 (m, 2H), 6.64 (s, 1H), 6.04 (q, *J* = 4.8 Hz, 1H), 5.00 (s, 2H), 3.03 (d, *J* = 4.8 Hz, 3H), 2.62 (s, 3H). MS-ESI calculated for C<sub>23</sub>H<sub>19</sub>N<sub>5</sub>O<sub>4</sub>S (M+H) 462, found *m/z* 462. LC-MS (UV-254), purity: 98%.

**40**: 2-[3-(Phenylsulfonyl)-7-methyl-2-(methylamino)pyrazolo[1,5-*a*]pyrimidin-5-ylmethyl]isoindole-1,3-dione (yield: 65%). <sup>1</sup>H NMR (CDCl<sub>3</sub>), δ 8.15 (m, 2H), 7.93 (m, 2H), 7.81 (m, 2H), 7.53 (m, 1H), 7.47 (m, 2H), 6.44 (s, 1H), 6.05 (q, *J* = 5.2 Hz, 1H), 5.20 (s, 2H), 2.99 (d, *J* = 5.2 Hz, 3H), 2.54 (s, 3H). MS-ESI calculated for C<sub>23</sub>H<sub>19</sub>N<sub>5</sub>O<sub>4</sub>S (M+H) 462, found *m/z* 462. LC-MS (UV-254), purity: 98%.

**41**: 3-[5-Methyl-2-(methylamino)-3-(phenylsulfonyl)pyrazolo[1,5-*a*]pyrimidin-7-yl]propionic acid ethyl ester (yield: 20%). <sup>1</sup>H NMR (CDCl<sub>3</sub>), δ 8.17 (dd, *J*<sub>1</sub> = 8.0 Hz, *J*<sub>2</sub> = 1.2 Hz, 2H), 7.49 (m, 3H), 6.58 (s, 1H), 6.03 (q, *J* = 5.2 Hz, 1H), 4.14 (q, *J* = 7.6 Hz, 2H), 3.28 (t, *J* = 6.8 Hz, 2H), 3.03 (d, *J* = 5.6 Hz, 3H), 2.86 (t, *J* = 7.6 Hz, 2H), 1.24 (t, *J* = 7.2 Hz, 3H). <sup>13</sup>C NMR (DMSO-*d*<sub>6</sub>) δ 171.81, 160.03, 157.09, 145.20, 144.14, 143.95, 132.56, 128.95, 125.64,

118.48, 89.55, 60.02, 32.68, 28.90, 23.14, 22.75, 13.97, 13.37. MS-ESI calculated for  $C_{19}H_{22}N_4O_4S$  (M+H) 403, found m/z 403. LC-MS (UV-254), purity: 98%.

**42:** 2-[5,7-Dimethyl-2-(methylamino)-3-(phenylsulfonyl)pyrazolo[1,5-*a*]pyrimidin-6-yl]acetic acid ethyl ester (yield: 48%).  $^1H$  NMR (400 MHz, DMSO- $d_6$ ),  $\delta$  8.03 (m, 2H), 7.53–7.62 (m, 3H), 6.36 (q,  $J$  = 4.8 Hz, 1H), 4.09 (q,  $J$  = 7.2 Hz, 2H), 3.82 (s, 2H), 2.92 (d,  $J$  = 4.8 Hz, 3H), 2.60 (s, 3H), 2.49 (s, 3H), 1.18 (t,  $J$  = 7.2 Hz, 3H). MS-ESI calculated for  $C_{18}H_{20}N_4O_4S$  (M+H) 389, found m/z 389. LC-MS (UV-254), purity: 98%.

**43:** 2-[5,7-Dimethyl-3-(3-fluorophenylsulfonyl)-2-(methylamino)pyrazolo[1,5-*a*]pyrimidin-6-yl]acetic acid ethyl ester (yield: 42 %).  $^1H$  NMR (400 MHz, DMSO- $d_6$ ),  $\delta$  7.85 (t,  $J$  = 8 Hz, 2H), 7.62 (dt,  $J_1$  = 8.8 Hz,  $J_2$  = 6.4 Hz, 1H), 7.47 (dt,  $J_1$  = 9.2 Hz,  $J_2$  = 2.4 Hz, 1H), 6.38 (q,  $J$  = 4.4 Hz, 1H), 4.09 (q,  $J$  = 7.2 Hz, 2H), 3.83 (s, 2H), 2.91 (d,  $J$  = 4.8 Hz, 3H), 2.60 (s, 3H), 1.18 (t,  $J$  = 6.8 Hz, 3H). MS-ESI calculated for  $C_{19}H_{21}FN_4O_4S$  (M+H) 421, found m/z 421. LC-MS (UV-254), purity: 98%.

**44:** 2-[3-(3-Chlorophenylsulfonyl)-5,7-dimethyl-2-(methylamino)pyrazolo[1,5-*a*]pyrimidin-6-yl]acetic acid ethyl ester (yield: 84 %).  $^1H$  NMR (400 MHz, DMSO- $d_6$ ),  $\delta$  8.10 (s, 1H), 7.96 (d,  $J$  = 7.2 Hz, 1H), 7.68 (d,  $J$  = 9.2 Hz, 1H), 7.60 (t,  $J$  = 7.6 Hz, 1H), 6.39 (q,  $J$  = 5.1 Hz, 1H), 4.09 (q,  $J$  = 7.2 Hz, 2H), 3.83 (s, 2H), 2.91 (d,  $J$  = 5.2 Hz, 3H), 2.60 (s, 3H), 1.18 (t,  $J$  = 7.2 Hz, 3H). MS-ESI calculated for  $C_{19}H_{21}ClN_4O_4S$  (M+H) 437, found m/z 437. LC-MS (UV-254), purity: 98%.

**45:** 3-[5,7-Dimethyl-2-(methylamino)-3-(phenylsulfonyl)pyrazolo[1,5-*a*]pyrimidin-6-yl]propionic acid ethyl ester (yield: 71 %).  $^1H$  NMR (400 MHz, DMSO- $d_6$ ),  $\delta$  8.16 (m, 2H), 7.44–7.52 (m, 3H), 5.99 (q,  $J$  = 4.8 Hz, 1H), 4.15 (q,  $J$  = 7.2 Hz, 2H), 3.04 (d,  $J$  = 4.8 Hz, 3H), 2.98 (m, 2H), 2.67 (s, 3H), 2.61 (s, 3H), 2.46 (m, 2H), 1.25 (t,  $J$  = 7.2 Hz, 3H). MS-ESI calculated for  $C_{20}H_{24}N_4O_4S$  (M+H) 417, found m/z 417. LC-MS (UV-254), purity: 98%.

## 2. Synthesis of substituted (7-chloro-5-methyl-3-phenylsulfonyl-pyrazolo[1,5-*a*]pyrimidine-2-yl)-methylamines **54** – **56** (Refer to Schema 3 in the paper).

Compounds **36** – **38** (20 mmol each) were mixed with  $POCl_3$  (6.12 g, 40 mmol) and sulfolane (25 mL) and stirred separately at 70 °C for 3 hr. The samples were cooled down and each mixture was poured into ice/water (200 mL). The formed precipitates were separated by filtration, washed with water, and dried to afford crude (7-chloro-5-methyl-3-(phenylsulfonyl)pyrazolo[1,5-*a*]pyrimidin-2-yl)methylamines **54** – **56** (yields: 60–88%) that were used in the follow up step without further purification.

**54:** 7-Chloro-*N*,5-dimethyl-3-(phenylsulfonyl)pyrazolo[1,5-*a*]pyrimidin-2-amine (yield: 91 %).  $^1H$  NMR ( $CDCl_3$ )  $\delta$  8.16 (s, 1H), 8.14 (s, 2H), 7.54 (t,  $J$  = 7.6 Hz, 2H), 7.48 (t,  $J$  = 7.6 Hz, 3H), 6.78 (s, 1H), 3.09 (s, 3H), 2.59 (s, 3H).  $^{13}C$  NMR ( $CDCl_3$ )  $\delta$  161.04, 158.22, 148.24, 143.09, 137.44, 132.26, 128.31, 126.18, 108.66, 92.32, 28.67, 24.34. MS-ESI calculated for  $C_{14}H_{13}ClN_4O_2S$  (M+H) 337, found m/z 337. LC-MS (UV-254), purity: 98%.

**55:** 6,7-Dichloro-*N*,5-dimethyl-3-(phenylsulfonyl)pyrazolo[1,5-*a*]pyrimidin-2-amine (yield: 31 %).  $^1H$  NMR (DMSO- $d_6$ )  $\delta$  8.03 (m, 2H), 7.63 (m, 1H), 7.56 (m, 2H), 6.67–6.53 (brs, 1H), 2.92 (s, 3H), 2.62 (s, 3H). MS-ESI calculated for  $C_{14}H_{12}Cl_2N_4O_2S$  (M+H) 372, found m/z 372. LC-MS (UV-254), purity: 98%.

**56:** 6,7-Dichloro-3-(3-chlorophenylsulfonyl)-*N*,5-dimethylpyrazolo[1,5-*a*]pyrimidin-2-amine (yield: 57%).  $^1H$  NMR (DMSO- $d_6$ )  $\delta$  8.07 (s, 1H), 7.97 (d,  $J$  = 8 Hz, 1H), 7.71 (s,  $J$  = 8.4 Hz, 1H), 7.62 (t,  $J$  = 8 Hz, 1H), 6.63 (m, 1H), 2.92 (d,  $J$  = 4.4 Hz, 3H), 2.63 (s, 3H). MS-ESI calculated for  $C_{14}H_{11}Cl_3N_4O_2S$  (M+H) 406, found m/z 406. LC-MS (UV-254), purity: 98%.
